# Supplementary material for: A disposable paper-based electrochemical biosensor decorated by electrospun cellulose acetate nanofibers for highly sensitive bio-detection
Source: Royal Society of Chemistry journal article supplement (doi:10.1039/d4an00164h), 2024-01-01
Supplement: d4an00164h1.pdf [file d4an00164h1.pdf]

## Supplementary Information

### A Disposable Paper-based Electrochemical Biosensor Decorated by Electrospun

#### Cellulose Acetate Nanofibers for highly Sensitive Bio-detection

Zhiwei Zhang<sup>a, &</sup>, Manman Du<sup>a, b, &</sup>, Xiao Cheng<sup>a, &</sup>, Xuecheng Dou<sup>a</sup>, Junting Zhou<sup>a, c</sup>, Jianguo Wu<sup>a, c</sup>,

Xinwu Xie<sup>a, d, \*</sup>, Mengfu Zhu<sup>a, d, \*</sup>

a, Systems Engineering Institute, People's Liberation Army, Tianjin 300161, China

b, School of Environmental Science and Engineering, Tianjin University, Tianjin, 300072, China

c, School of Electronic Information and Automation, Tianjin University of Science and Technology,  
Tianjin 300222, China

d, National Bio-Protection Engineering Center, Tianjin 300161, China

& These authors contribute equally in this work.

\* Corresponding author to Xinwu Xie (xinwuxie@163.com) and Mengfu Zhu (zmf323@163.com).

Tel: 86-022-84660562

Fax: 86-022-84660562

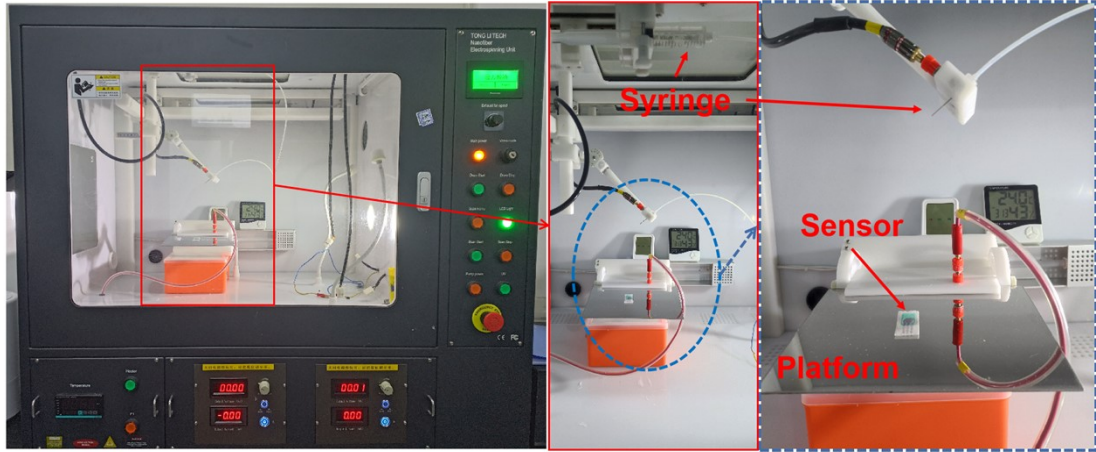

**Fig. S1** The details of electrospinning device and the sensor.

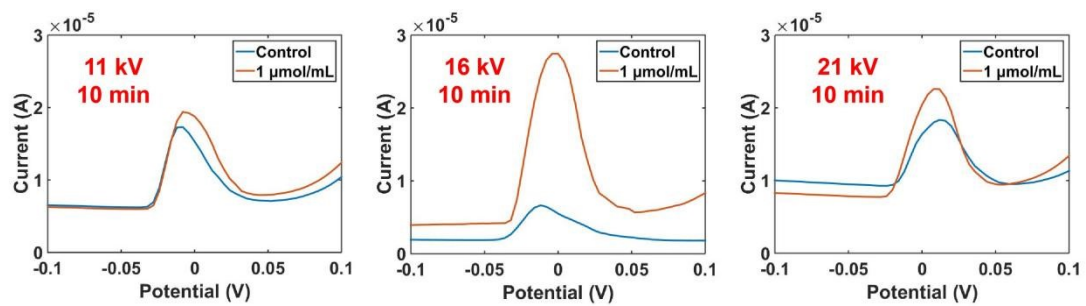

**Fig. S2** DPV curves of electrospinning CA nanofibers with different excitation voltage (11, 16, and 21 kV); coating time duration=10 min.

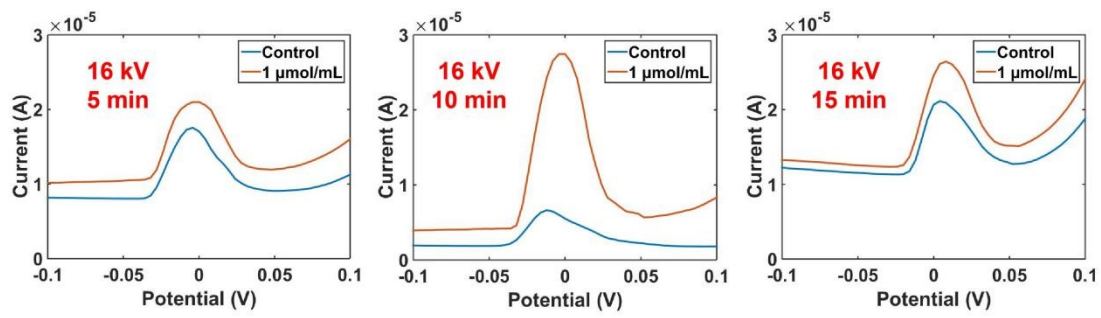

**Fig. S3** DPV curves of the CA nanofibers at different electrospinning duration. 5 (a), 10 (b), and 15 min (c) at voltage=16 kV.

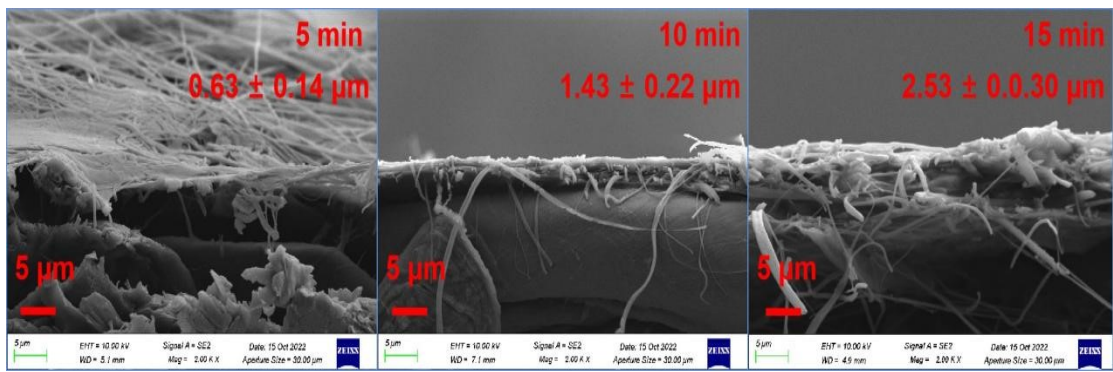

**Fig. S4** SEM images of the cross-section and the thickness of the CA nanofibers at different electrospinning duration. 5 (a), 10 (b), and 15 min (c) at voltage=16 kV.

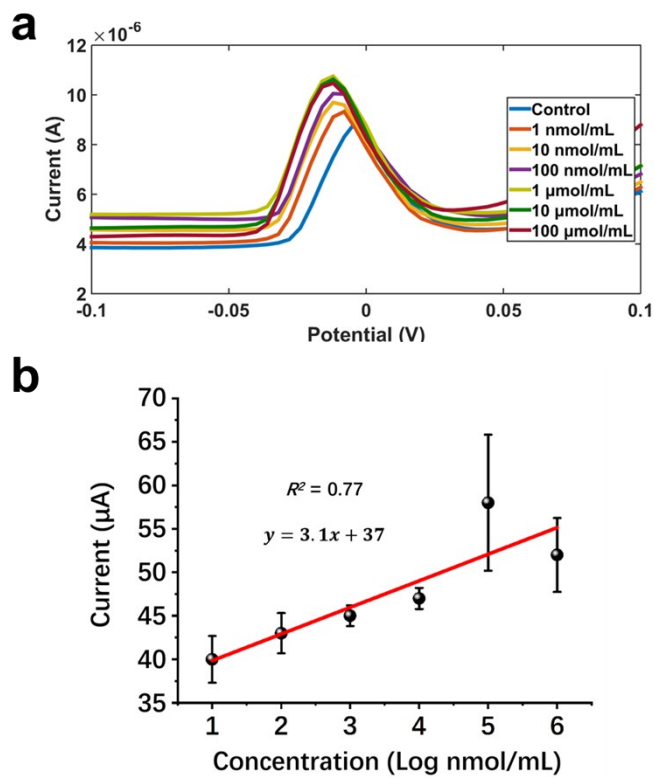

**Fig. S5** (a) DPV curves and (b) calibration curve of glucose detection by the bare PBSP electrodes.

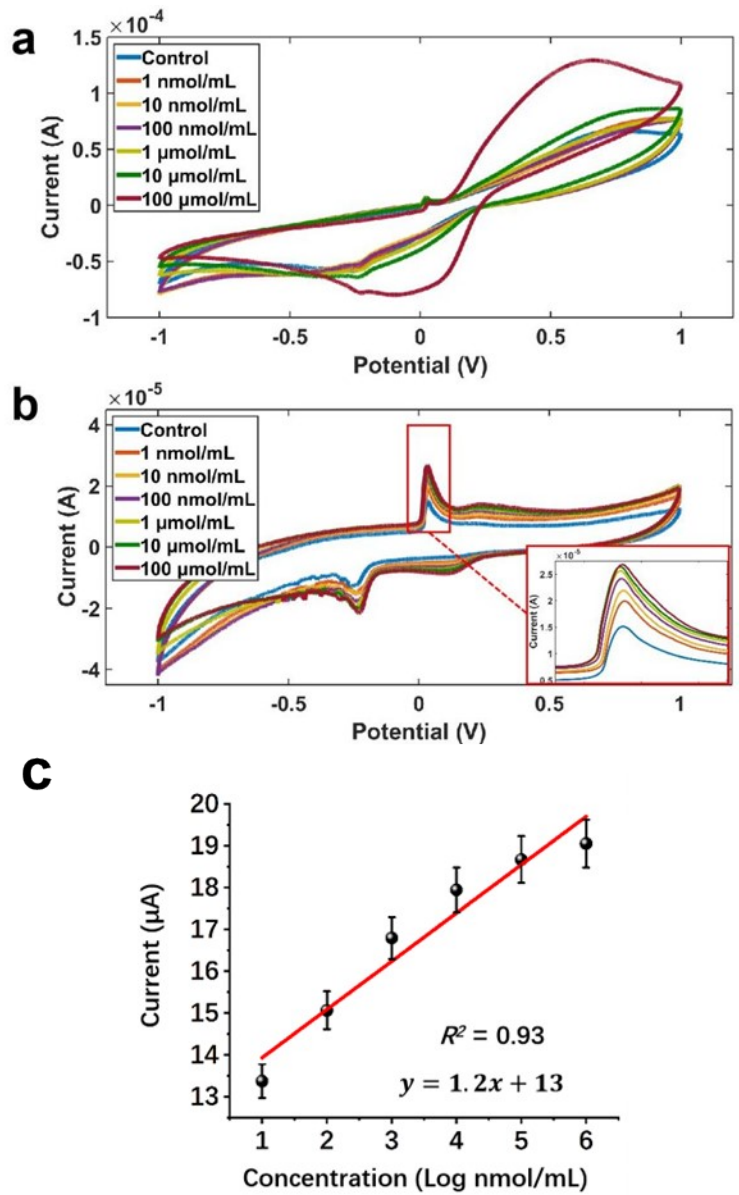

**Fig. S6** (a) CV curves of glucose detection by the bare PBSP electrodes; (b) CV curves and (c) calibration curve of glucose detection by CA NFs-decorated PBSP electrodes.

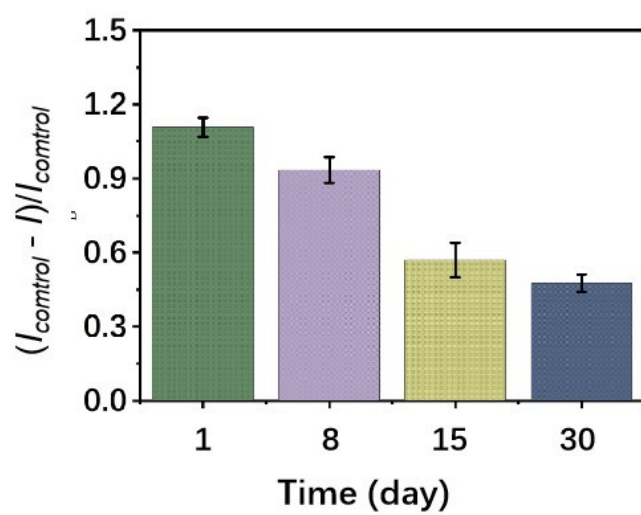

**Fig. S7** Stability of CA NFs-decorated PBSP electrodes after modification of glucose oxidase



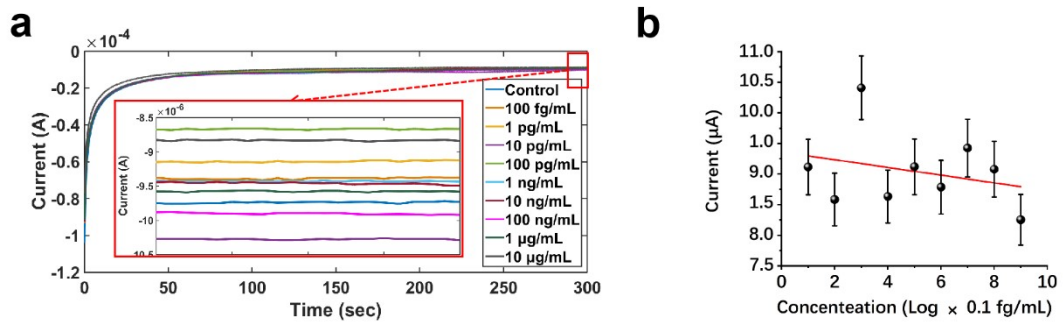

**Fig. S8** (a)  $I$ - $t$  curves and (b) calibration curve of Ag85B protein detection by bare PBSP electrodes.

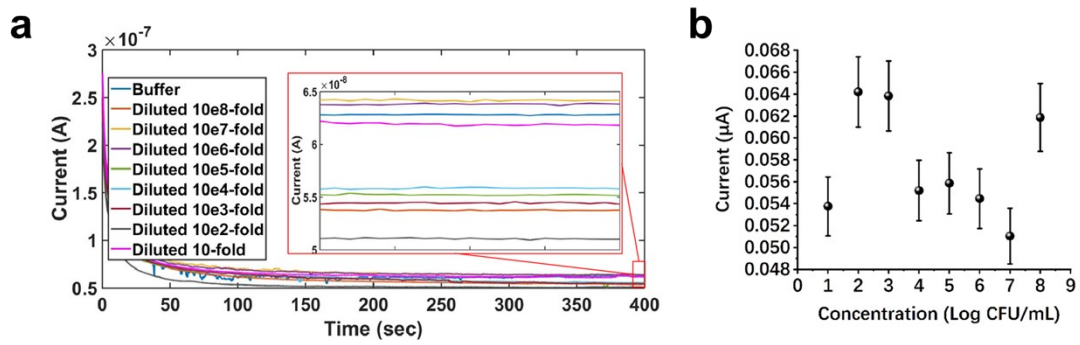

**Fig. S9** (a) I-t curves and (b) calibration curve of *E. Coli* O157:H7 detection by the CA NFs-decorated PBSP electrodes without the *E. coli* O157:H7 monoclonal antibody.

**Table S1.** Comparison of different electrochemical sensors for detecting glucose.

| Electrode                                       | Paper Structure | Technique | Range & LOD                                                               | Reference                          |
|-------------------------------------------------|-----------------|-----------|---------------------------------------------------------------------------|------------------------------------|
| CA/ZIF-8@enzyme/MWCNTs/AuNPs                    | No              | -         | 1 – 10 $\mu\text{mol/mL}$<br>LOD: 5.347 $\text{nmol/mL}$                  | Xin L., et al. <sup>1</sup>        |
| PVA-SbQ-MWCNTCOOHs                              | No              | -         | 5 $\text{nmol/mL}$ - 4 $\mu\text{mol/mL}$<br>LOD: 2 $\text{nmol/mL}$      | Eleni S., et al. <sup>2</sup>      |
| Graphene/polyaniline/AuNPs/glucose oxidase SPCE | Yes             | DPV       | 0.2 - 11.2 $\mu\text{mol/mL}$<br>LOD: 100 $\text{nmol/mL}$                | Fen-Ying K., et al. <sup>3</sup>   |
| PERs using a 3D printed BIA cell/SPEs           | Yes             | DPV       | 1 - 10 $\mu\text{mol/mL}$<br>LOD: 110 $\text{nmol/mL}$                    | Anderson A D., et al. <sup>4</sup> |
| CA NFs/paper-based SPEs                         | Yes             | CV/DPV    | 1 $\text{nmol/mL}$ - 100 $\mu\text{mol/mL}$<br>LOD: 0.71 $\text{nmol/mL}$ | <b>Present work</b>                |

**Table S2.** Comparison of different electrochemical sensors for detecting protein.

| Electrode                                                    | Paper Structure | Technique         | Range&LOD                               | Reference                       |
|--------------------------------------------------------------|-----------------|-------------------|-----------------------------------------|---------------------------------|
| Ab-25OHD/SPE/FMTAD                                           | Yes             | SPR               | 10 - 100 ng/mL<br>LOD: 10 ng/mL         | Chauhan D., et al. <sup>5</sup> |
| MWCNTs-doped Chitosan NFs                                    | No              | -                 | 1 pg/mL - 1 ng/mL<br>LOD: 0.05 pg/mL    | Wang X., et al. <sup>6</sup>    |
| PMPC-S/AuNPs-SPCE PADs                                       | Yes             | DPV               | 5 - 5000 ng/mL<br>LOD: 1.6 ng/mL        | Chanika P., et al. <sup>7</sup> |
| SPEs/rGO-TEPA/Au and simple paper-based microfluidic devices | Yes             | SWV               | 0.01 - 100.0 ng/mL<br>LOD: 0.005 ng/mL  | Liangli C., et al. <sup>8</sup> |
| CA NFs/paper-based SPEs                                      | Yes             | Chronoamperometry | 100 fg/mL - 10 µg/mL<br>LOD: 89.1 fg/mL | <b>Present work</b>             |

**Table S3.** Comparison of different electrochemical sensors for detecting bacteria.

| Electrode                                                       | Paper Structure | Technique         | Range&LOD                                                             | Reference                        |
|-----------------------------------------------------------------|-----------------|-------------------|-----------------------------------------------------------------------|----------------------------------|
| Silica NPs on polyelectrolyte multilayer on Au electrode        | No              | CV                | $8 \times 10^4 - 8 \times 10^6$ CFU/mL<br>LOD: $2 \times 10^3$ CFU/mL | Mathelie G., et al. <sup>9</sup> |
| Fluoride-doped tin oxide electrode                              | No              | DPV               | $10^3 - 10^7$ CFU/mL<br>LOD: $10^3$ CFU/mL                            | Divagar M., et al. <sup>10</sup> |
| Carbon paste, a mixture of multi-walled carbon nanotube (MWCNT) | Yes             | DPV               | $6.9 \times 10^2 - 10^6$ CFU/mL<br>LOD: 690 CFU/mL                    | Chanhwi P., et al. <sup>11</sup> |
| CA NFs/paper-based SPEs                                         | Yes             | Chronoamperometry | $1.5 \times 10^2 - 1.5 \times 10^6$ CFU/mL, LOD: 30 CFU/mL            | <b>Present work</b>              |

## References

- [1] X. Li, Q. Feng, K. Lu, J. Huang, Y. Zhang, Y. Hou, H. Qiao, D. Li and Q. Wei, *Biosens. Bioelectron.*, 2021, **171**, 112690.
- [2] E. Sapountzi, M. Braiek, C. Farre, M. Arab, J. F. Chateaux, N. Jaffrezic-Renault and F. Lagarde, *J. Electrochem. Soc.*, 2015, **162**, B275-B281.
- [3] F. Y. Kong, S. X. Gu, W. W. Li, T. T. Chen, Q. Xu and W. Wang, *Biosens. Bioelectron.*, 2014, **56**, 77-82.
- [4] A.A. Dias, T. M. G. Cardoso, R. M. Cardoso, L. C. Duarte, R. A. A. Munoz, E. M. Richter and W. K. T. Coltro, *Sensor Actuat B-chem.*, 2016, **226**, 196-203.
- [5] D. Chauhan and P. R. Solanki, *ACS Appl. Polym. Mater.*, 2019, **1**, 1613-1623.
- [6] X. Wang, Y. Wang, M. Jiang, Y. Shan, X. Jin, M. Gong and X. Wang, *Anal. Biochem.*, 2018, **548**, 15-22.
- [7] C. Pinyorosphatum, S. Chaiyo, P. Sae-ung, V. P. Hoven, P. Damsongsang, W. Siangproh and O. Chailapakul, *Microchim. Acta.*, 2019, **186**, 472-482.
- [8] L. Cao, C. Fang, R. Zeng, X. Zhao, F. Zhao, Y. Jianga and Z. Chen, *Sensor Actuat B-chem.*, 2017, **252**, 44-54.
- [9] M. Divagar, R. Sriramprabha, S. Sornambikai, N. Ponpandian and C. Viswanathan, *J. Electrochem. Soc.*, 2019, **166**, G1-G9.
- [10] M. G. Marion, C. B. Touria, G. Ibtissem, M. Axel, B. Laure, M. H. Delville and G. H. Christine, *Sensor Actuat B-chem.*, 2019, **292**, 314-320.
- [11] C. Park, J. Lee, D. Lee and J. Jang, *Sensor Actuat B-chem.*, 2022, **355**, 131321.
